# Supplementary material
Source: PubMed Central journal article supplement (PMC4683597)
Supplement: NIHMS742390-supplement-Supplement.pdf [file NIHMS742390-supplement-Supplement.pdf]

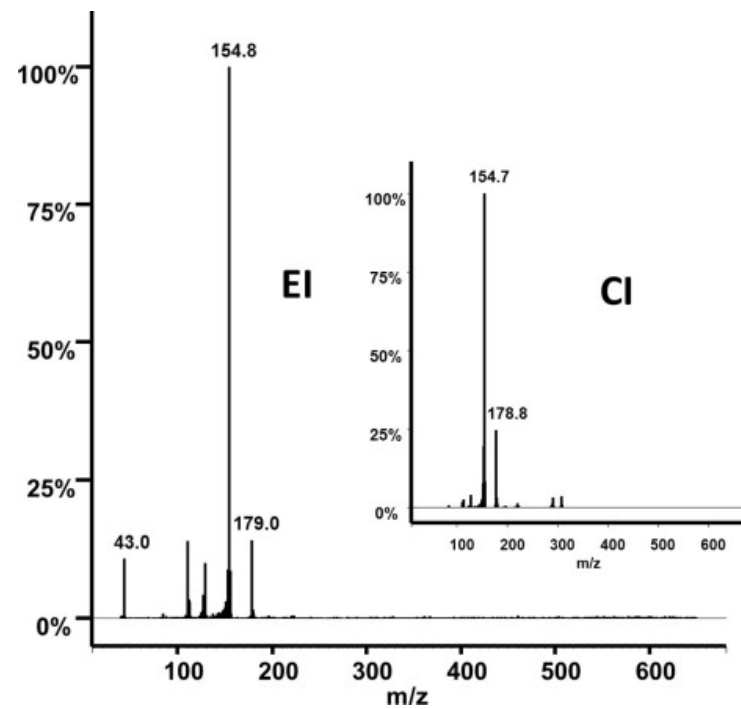

Supplementary Figure 1. Supplementary material contains Figs. 1–4.

Stacey E. Anderson, Jennifer Franko, J.R. Wells, Ewa Lukomska, B. Jean Meade

**Evaluation of the hypersensitivity potential of alternative butter flavorings**

Food and Chemical Toxicology, Volume 62, 2013, 373–381

<http://dx.doi.org/10.1016/j.fct.2013.08.053>

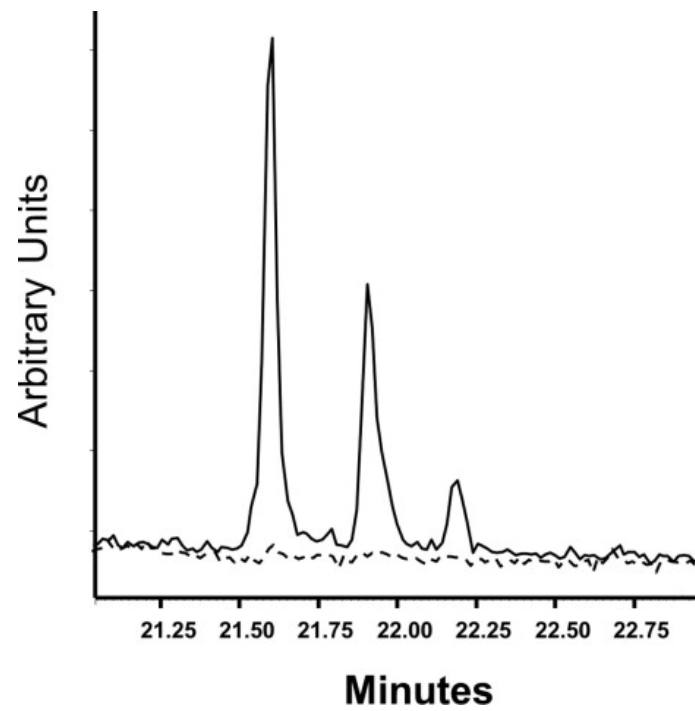

Supplementary Figure 2.

Stacey E. Anderson, Jennifer Franko, J.R. Wells, Ewa Lukomska, B. Jean Meade

**Evaluation of the hypersensitivity potential of alternative butter flavorings**

Food and Chemical Toxicology, Volume 62, 2013, 373–381

<http://dx.doi.org/10.1016/j.fct.2013.08.053>

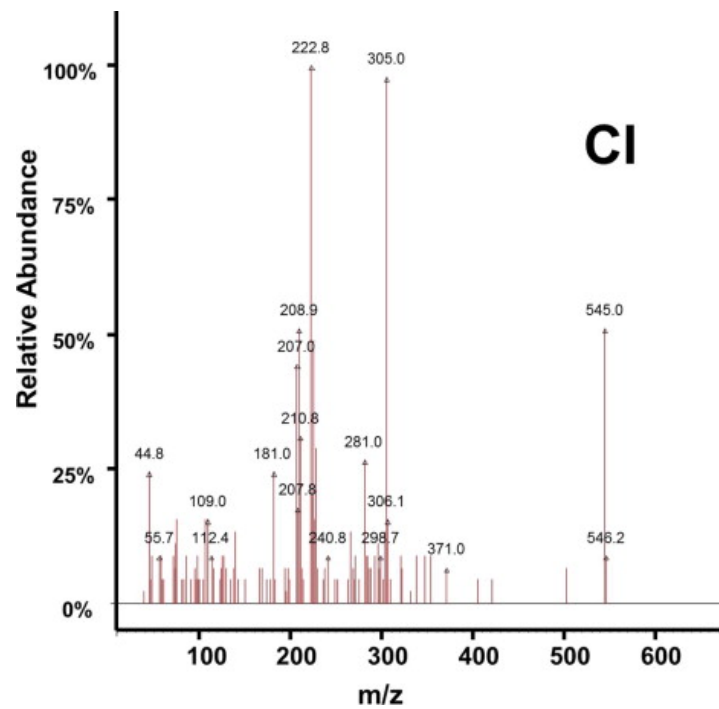

Supplementary Figure 3.

Stacey E. Anderson, Jennifer Franko, J.R. Wells, Ewa Lukomska, B. Jean Meade

**Evaluation of the hypersensitivity potential of alternative butter flavorings**

Food and Chemical Toxicology, Volume 62, 2013, 373–381

<http://dx.doi.org/10.1016/j.fct.2013.08.053>

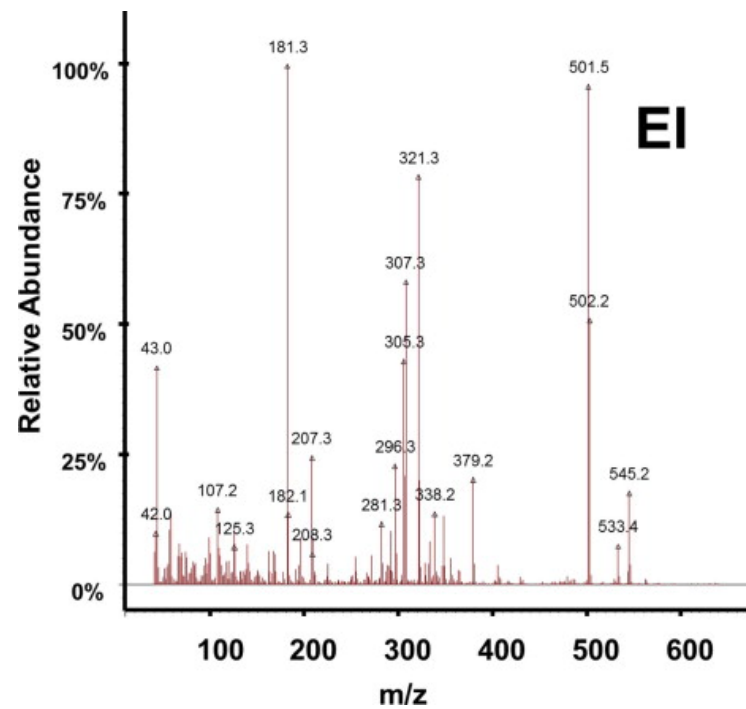

Supplementary Figure 3.

Stacey E. Anderson, Jennifer Franko, J.R. Wells, Ewa Lukomska, B. Jean Meade

**Evaluation of the hypersensitivity potential of alternative butter flavorings**

Food and Chemical Toxicology, Volume 62, 2013, 373–381

<http://dx.doi.org/10.1016/j.fct.2013.08.053>
